# Supplementary material for: PERK prevents rhodopsin degradation during retinitis pigmentosa by inhibiting IRE1-induced autophagy
Source: PubMed Central journal article supplement — J Cell Biol. 2023 Apr 6;222(5):e202208147. doi: 10.1083/jcb.202208147 (PMC10082367; doi:10.1083/jcb.202208147), 2023-04-06

Figure S4B

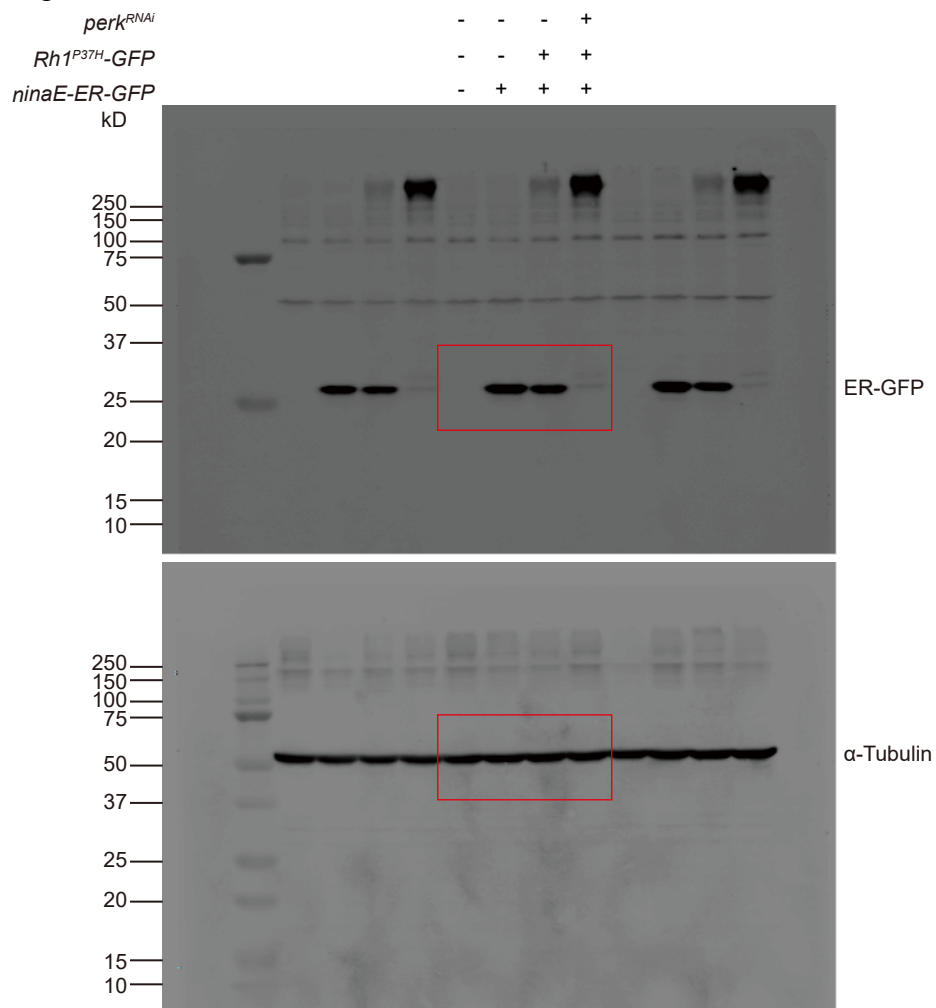

Figure S4C

|                               |   |   |   |   |
|-------------------------------|---|---|---|---|
| <i>perk<sup>RNAi</sup></i>    | - | - | - | + |
| <i>Rh1<sup>P37H</sup>-GFP</i> | - | - | + | + |
| <i>ninaE-mito-GFP</i>         | - | + | + | + |

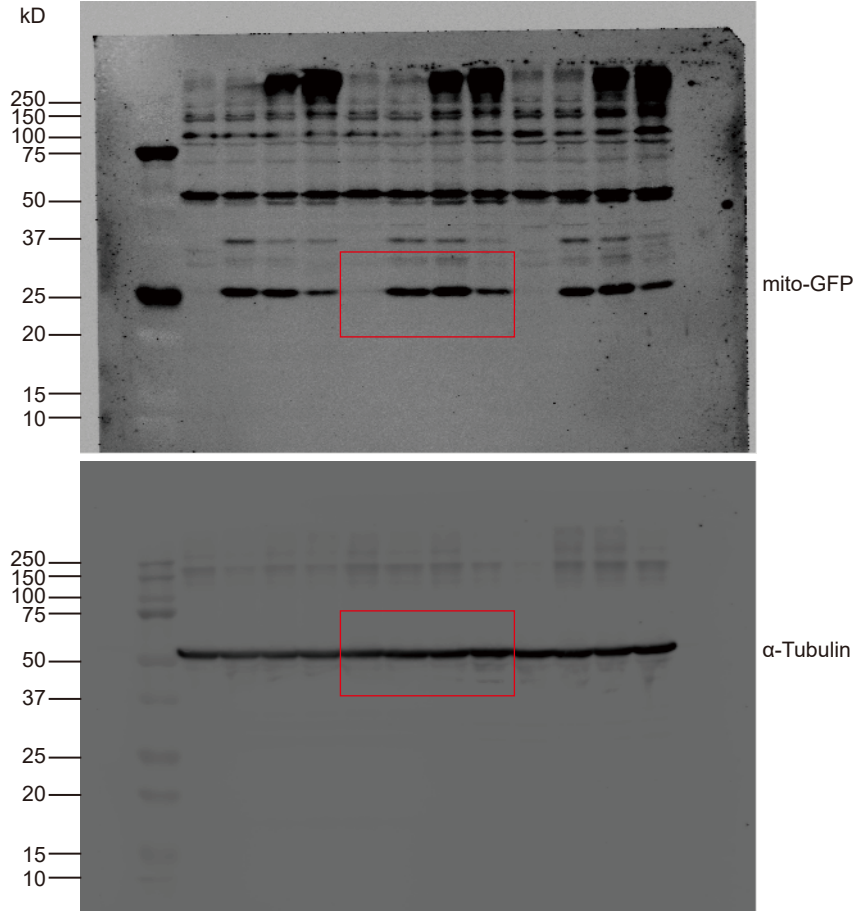

Figure S4D

|                               |   |   |   |   |
|-------------------------------|---|---|---|---|
| <i>perk<sup>RNAi</sup></i>    | - | - | - | + |
| <i>Rh1<sup>P37H</sup>-GFP</i> | - | - | + | + |
| <i>ninaE-GFP</i>              | - | + | + | + |

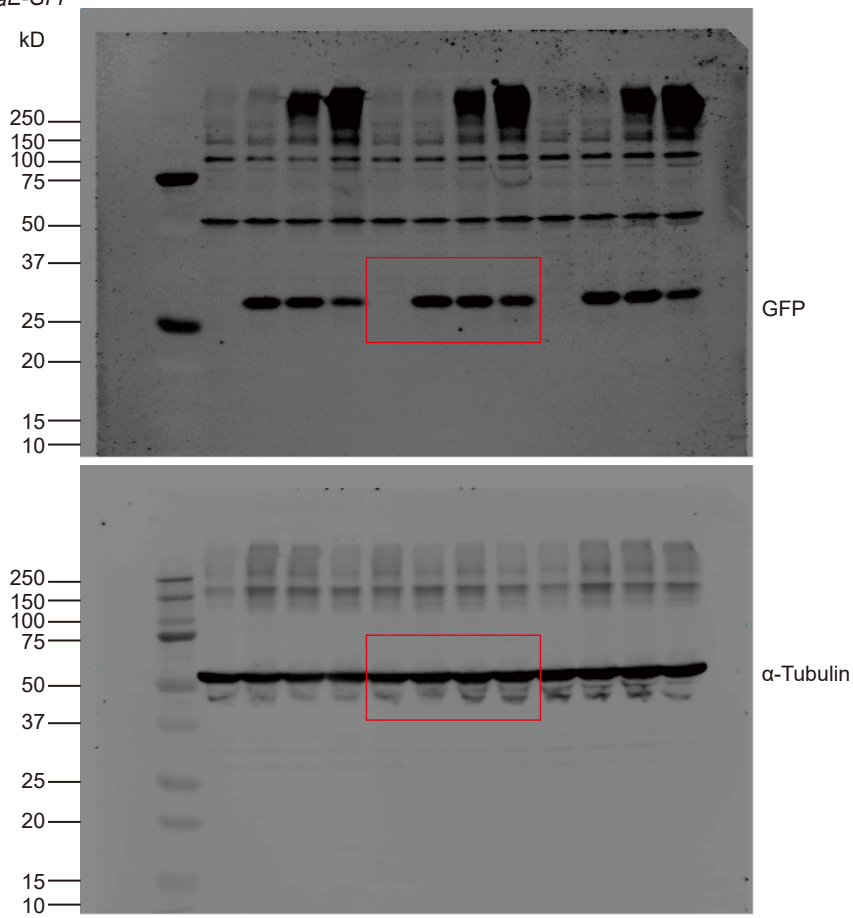

Figure S4J

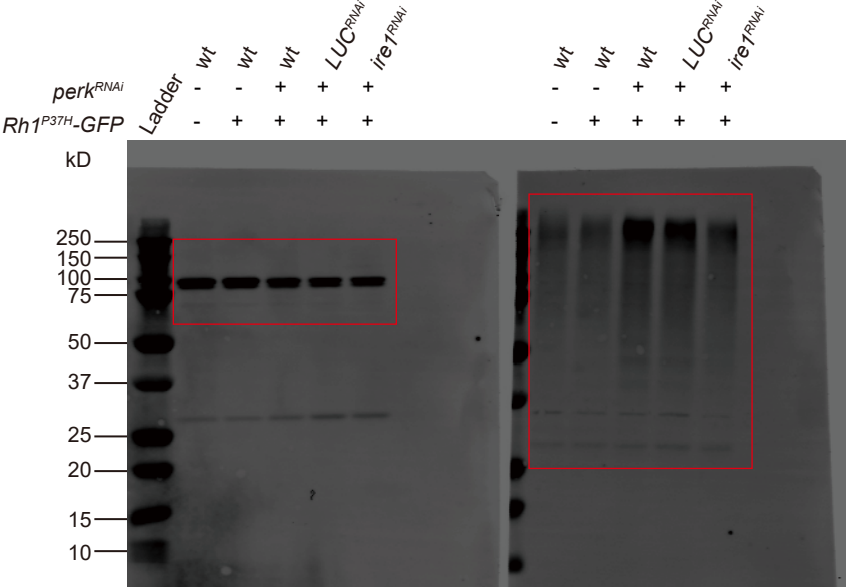

Supplement: JCB_202208147_SourceDataFS4.pdf [file JCB_202208147_SourceDataFS4.pdf]
