# Supplementary figures and images for: PERK prevents rhodopsin degradation during retinitis pigmentosa by inhibiting IRE1-induced autophagy
Source: PubMed Central journal article supplement — J Cell Biol. 2023 Apr 6;222(5):e202208147. doi: 10.1083/jcb.202208147 (PMC10082367; doi:10.1083/jcb.202208147), 2023-04-06

Figure 1B

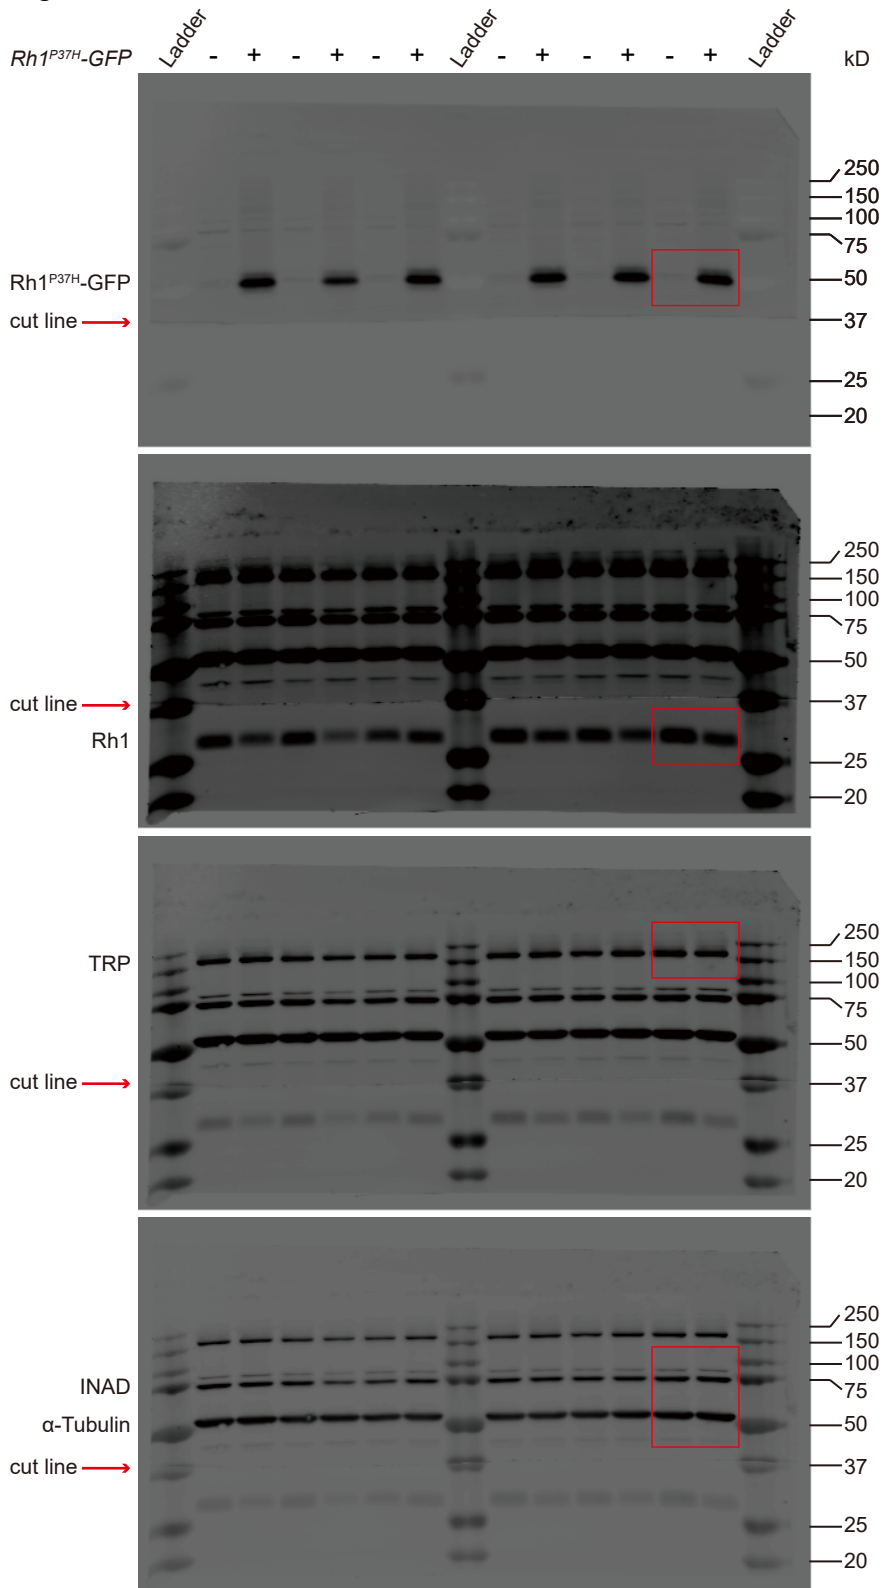

Supplement: JCB_202208147_SourceDataF1.pdf [file JCB_202208147_SourceDataF1.pdf]

Figure 2C

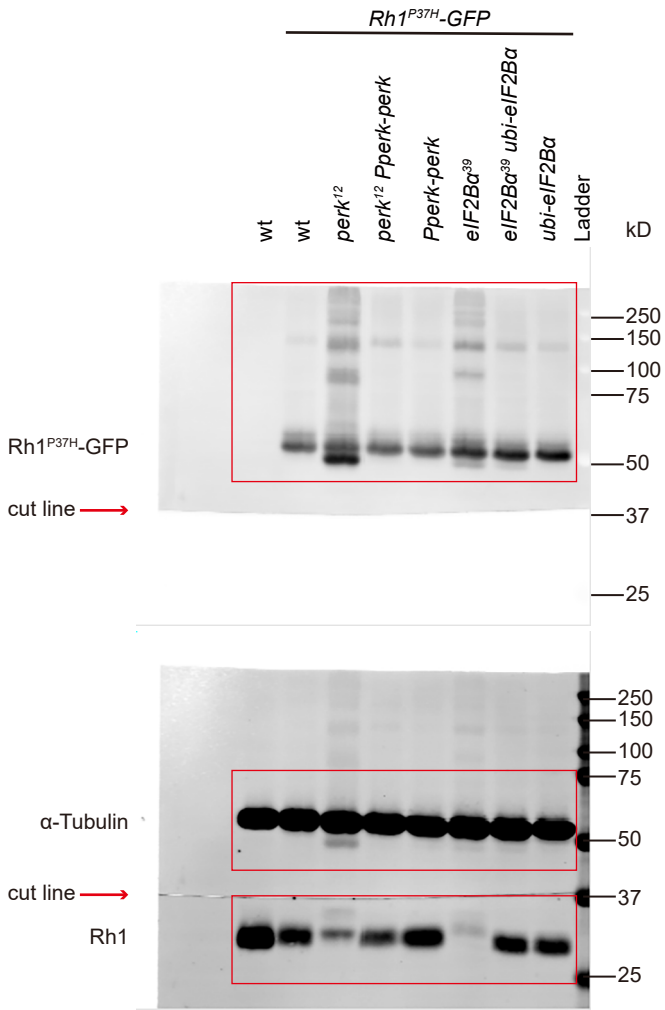

Figure 2D

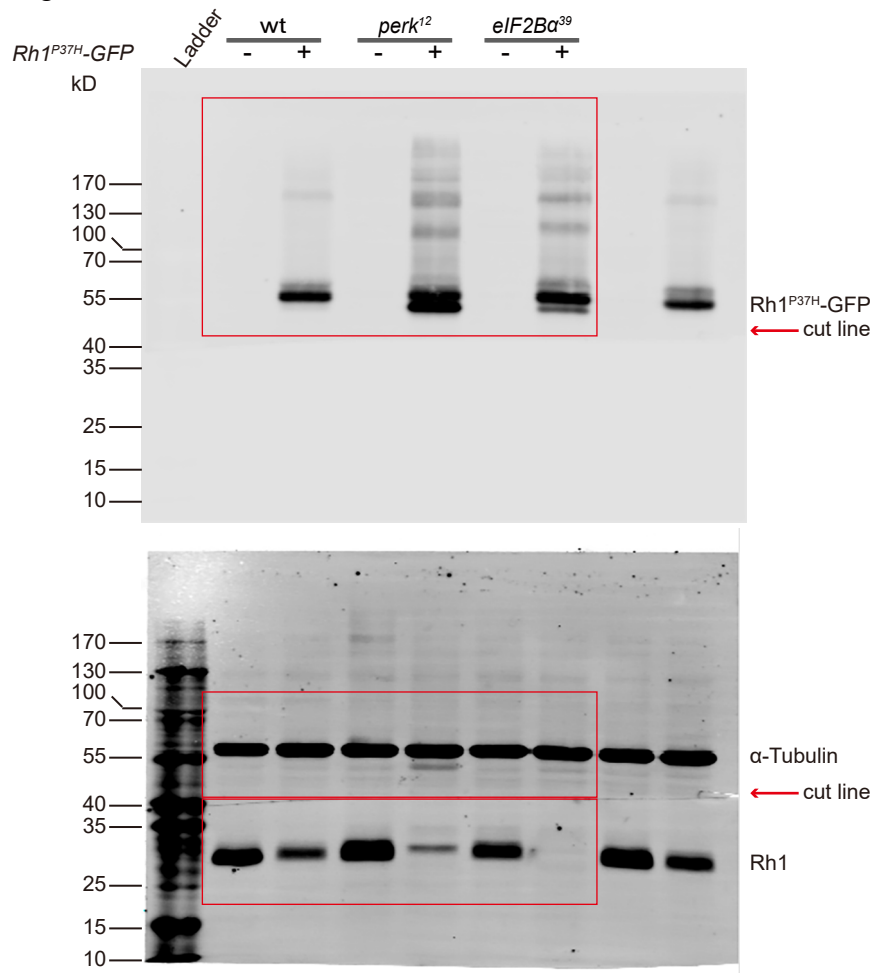

Supplement: JCB_202208147_SourceDataF2.pdf [file JCB_202208147_SourceDataF2.pdf]

Figure 3C

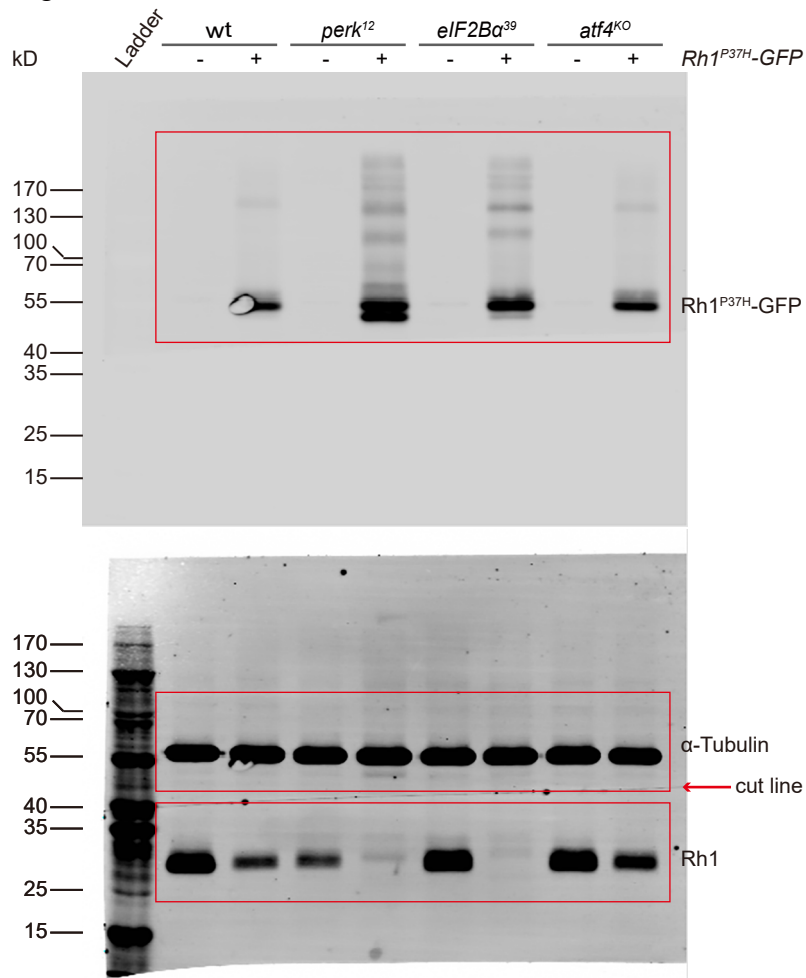

Figure 3E

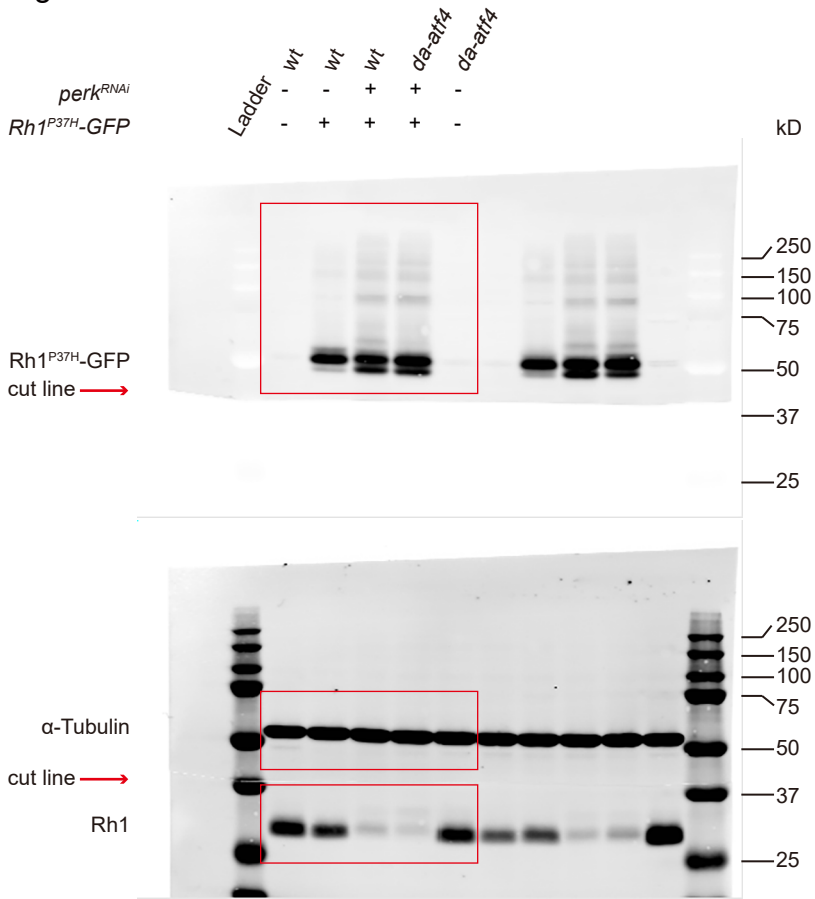

Supplement: JCB_202208147_SourceDataF3.pdf [file JCB_202208147_SourceDataF3.pdf]

Figure 4G

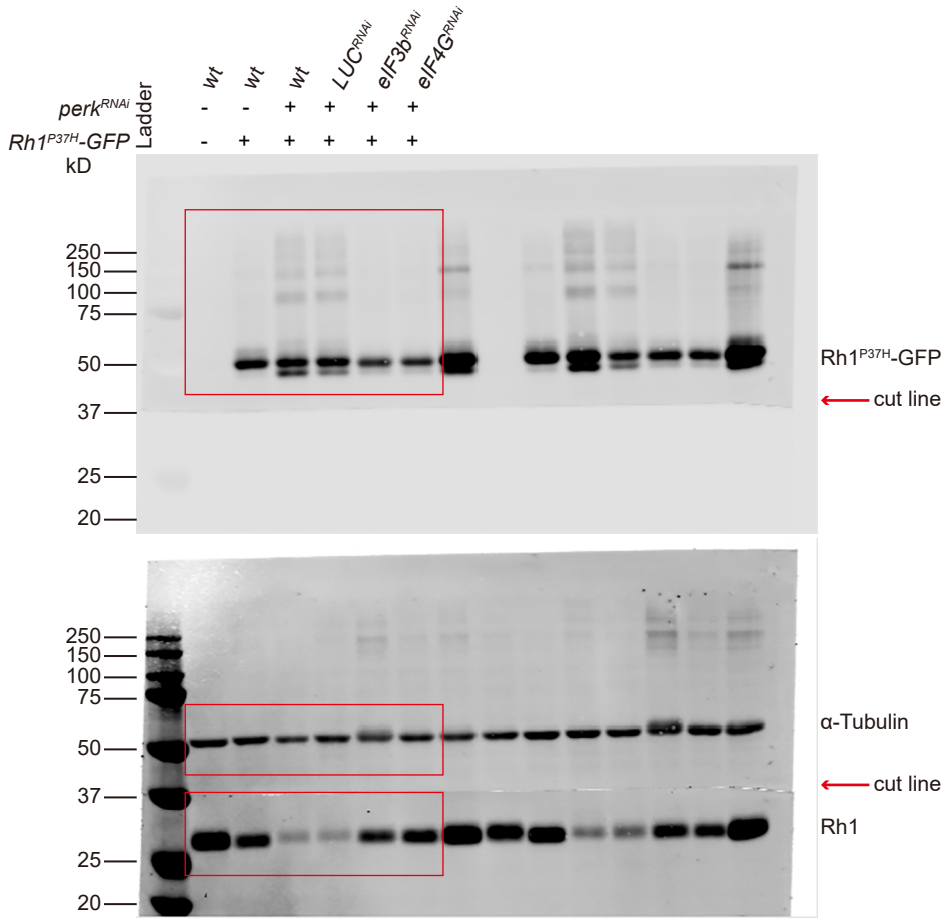

Supplement: JCB_202208147_SourceDataF4.pdf [file JCB_202208147_SourceDataF4.pdf]

Figure 5B

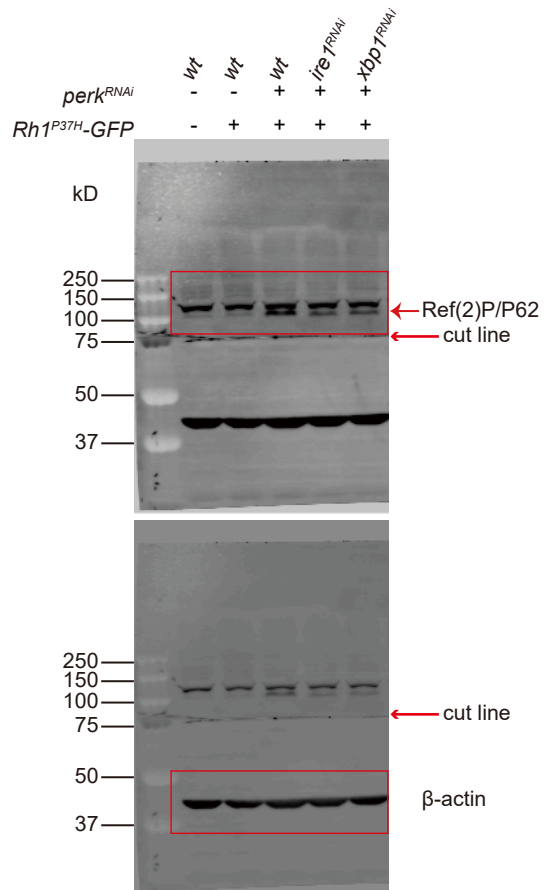

Supplement: JCB_202208147_SourceDataF5.pdf [file JCB_202208147_SourceDataF5.pdf]

Figure 6E

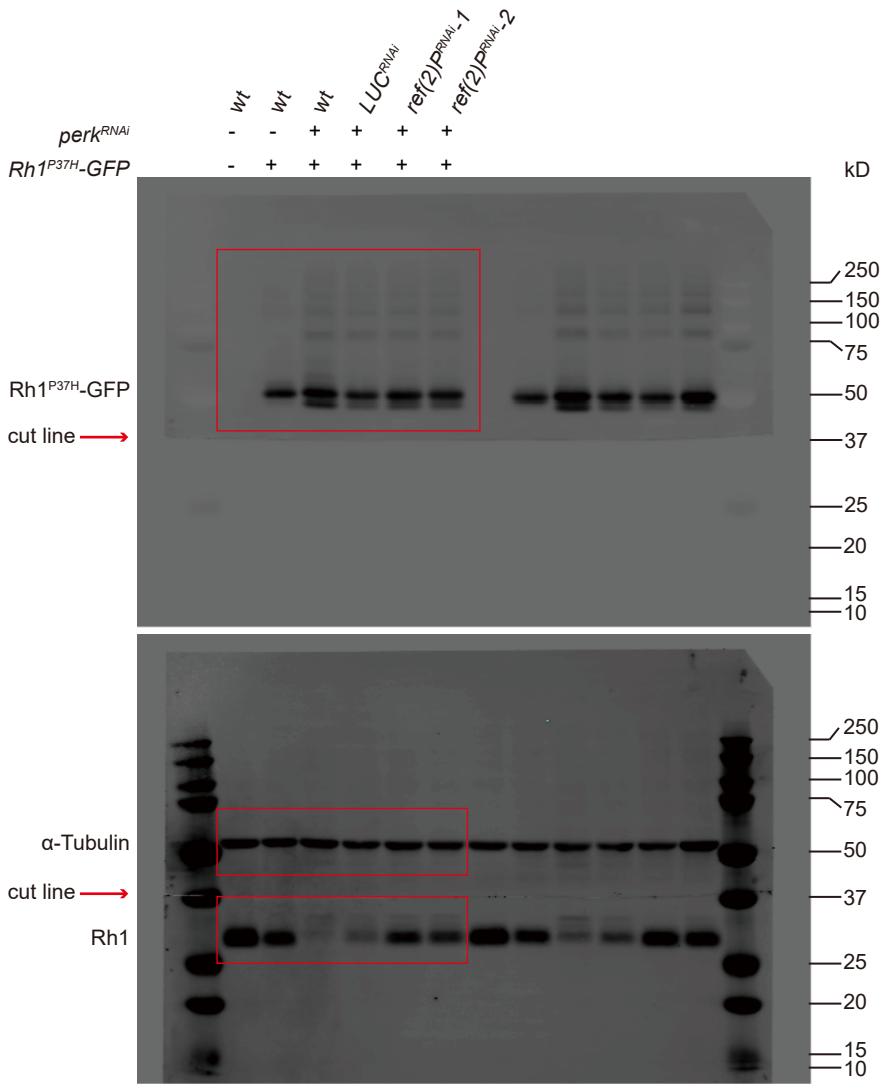

Figure 6G

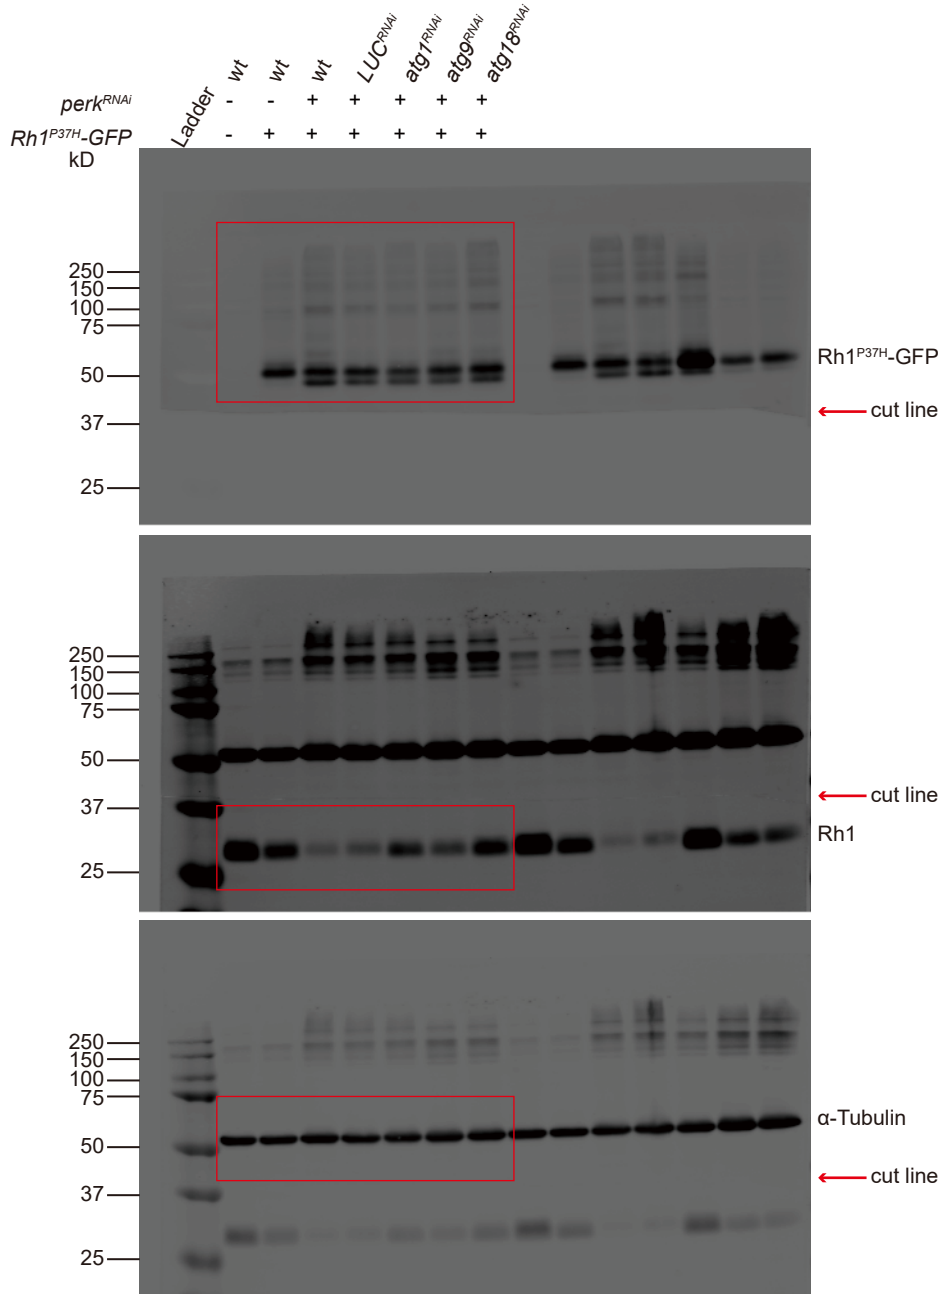

Supplement: JCB_202208147_SourceDataF6.pdf [file JCB_202208147_SourceDataF6.pdf]

Figure 7A

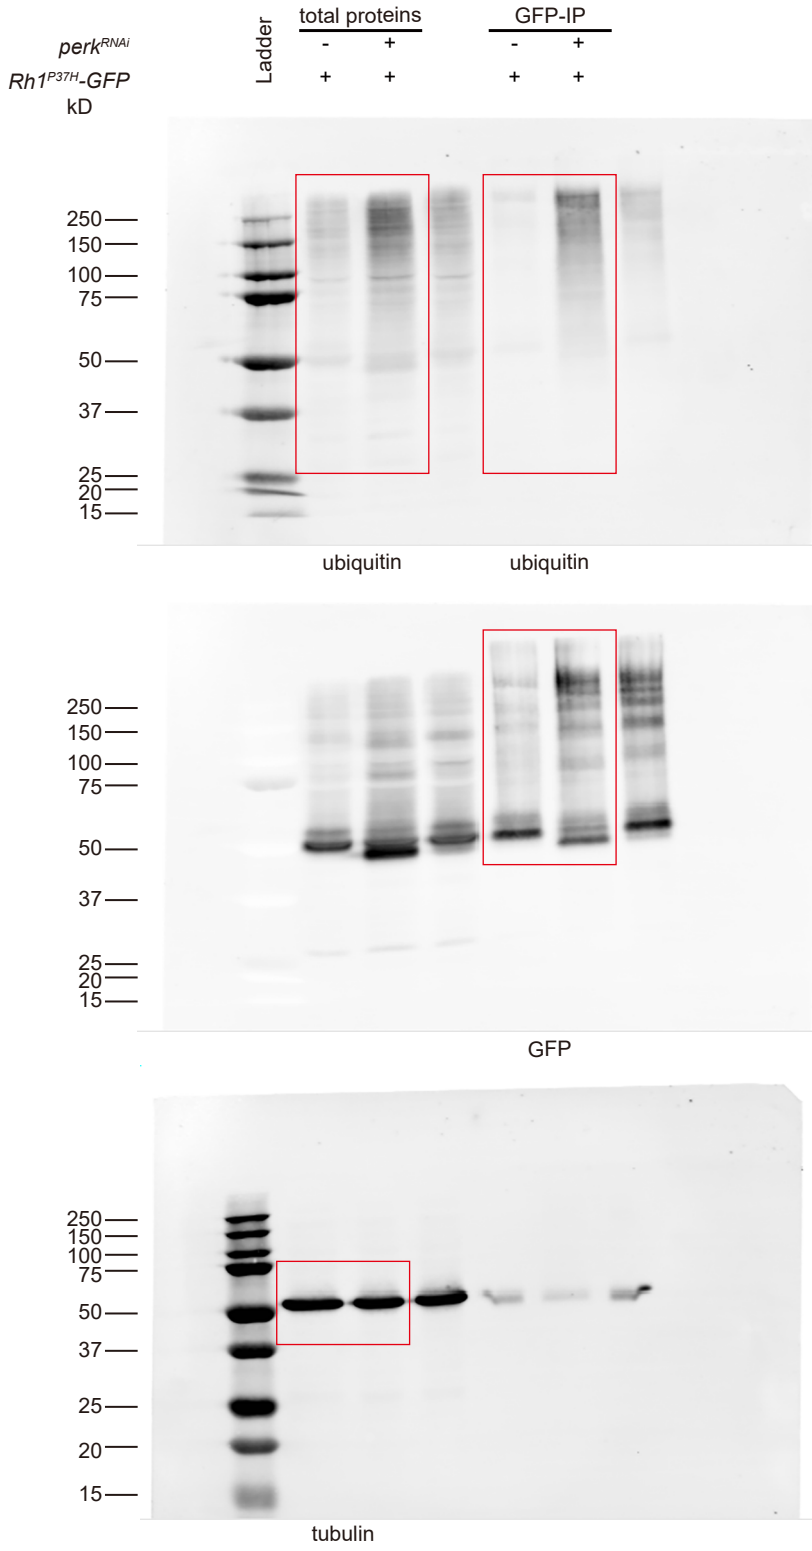

Figure 7C

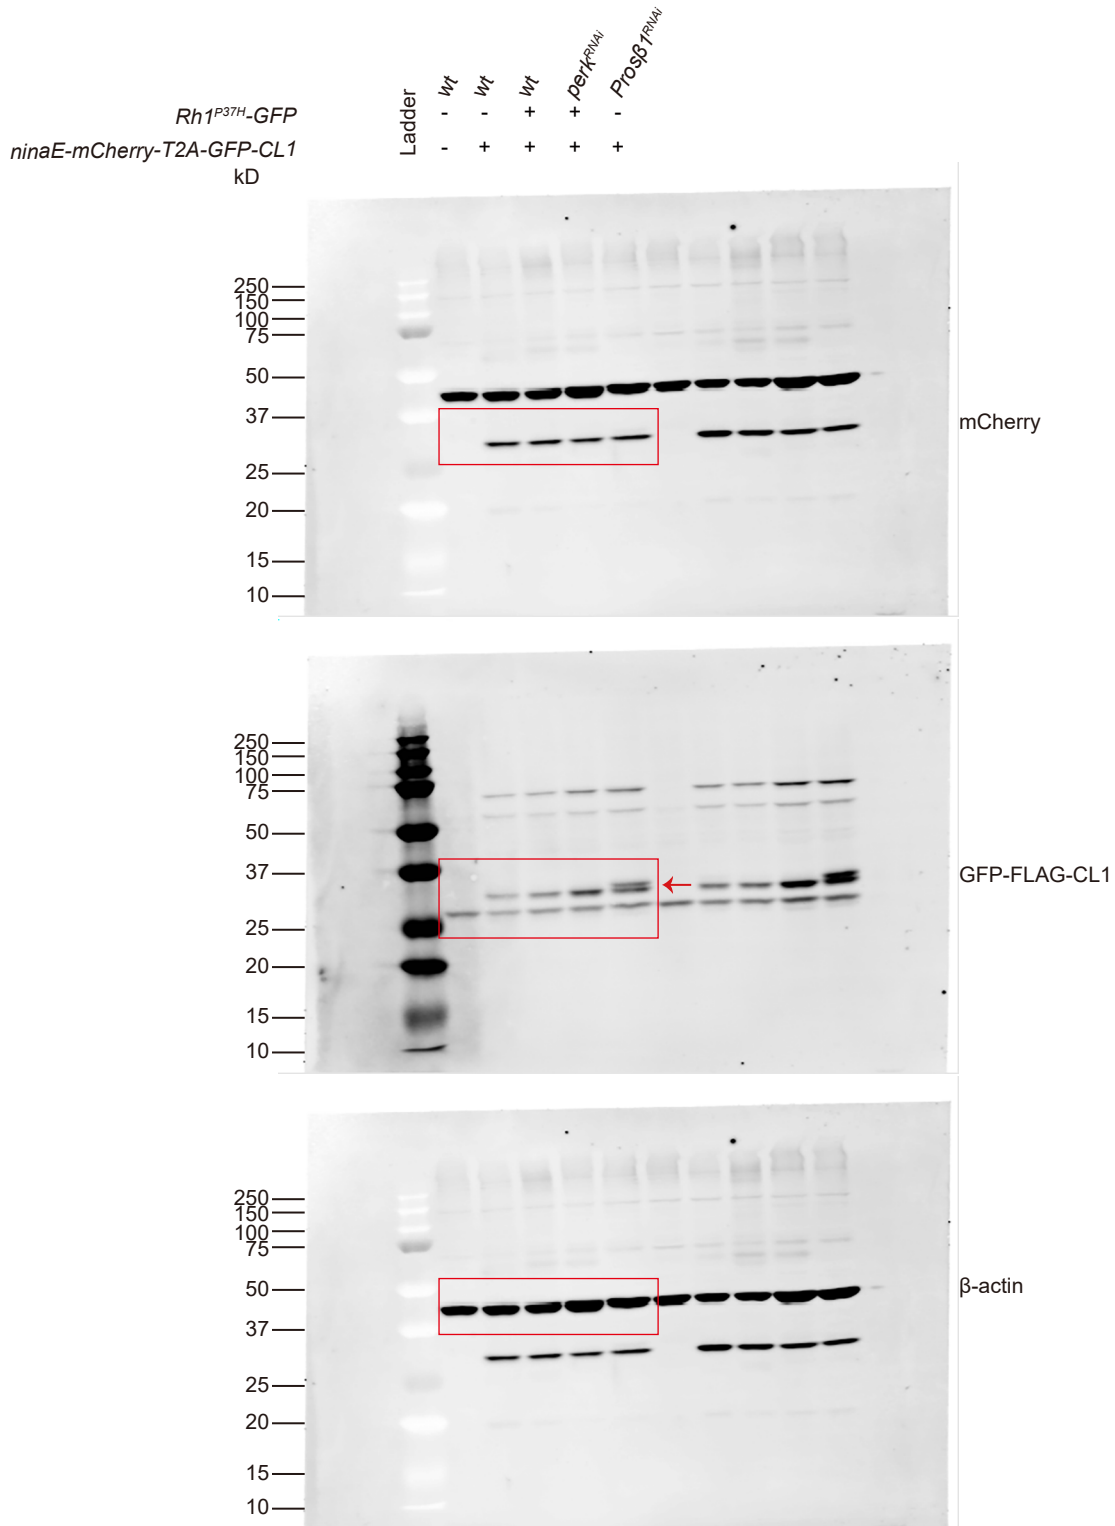

Figure 7E

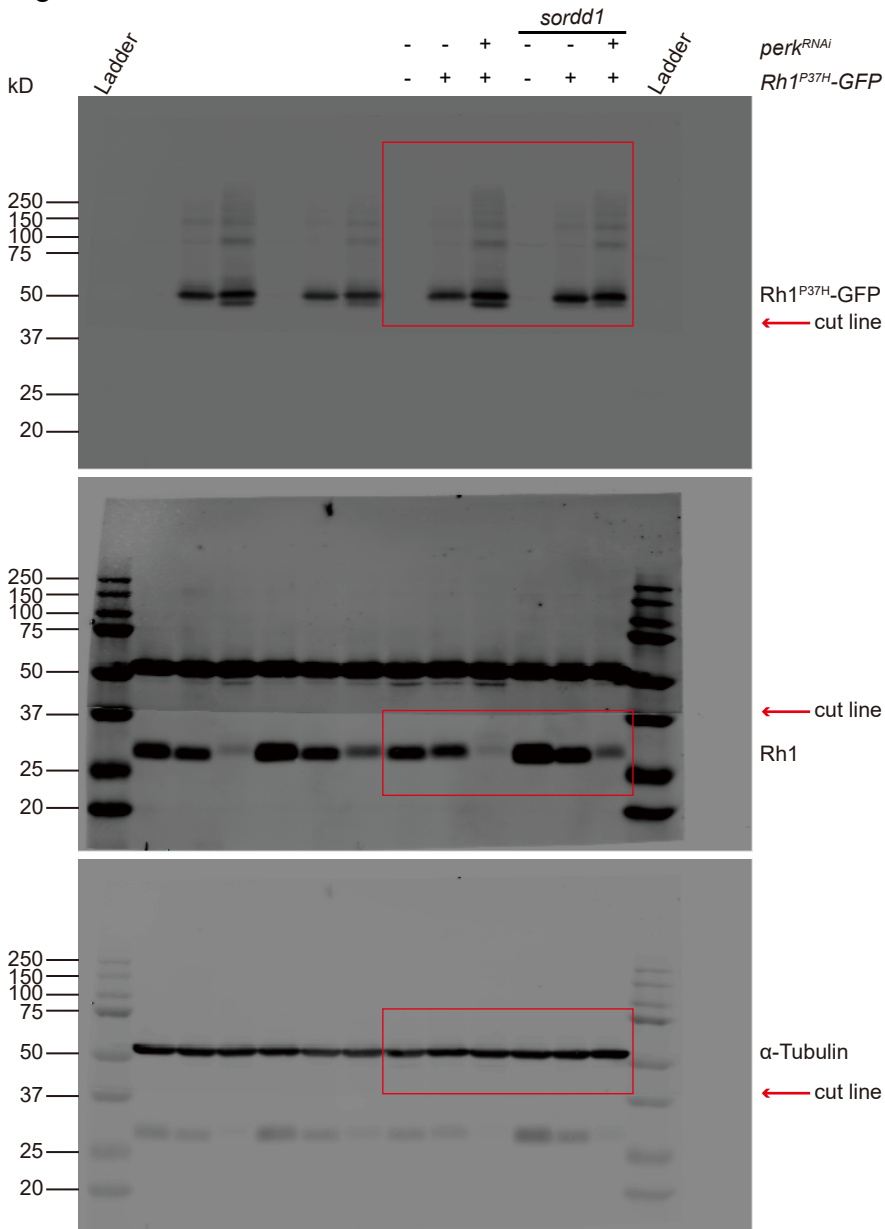

Figure 7G

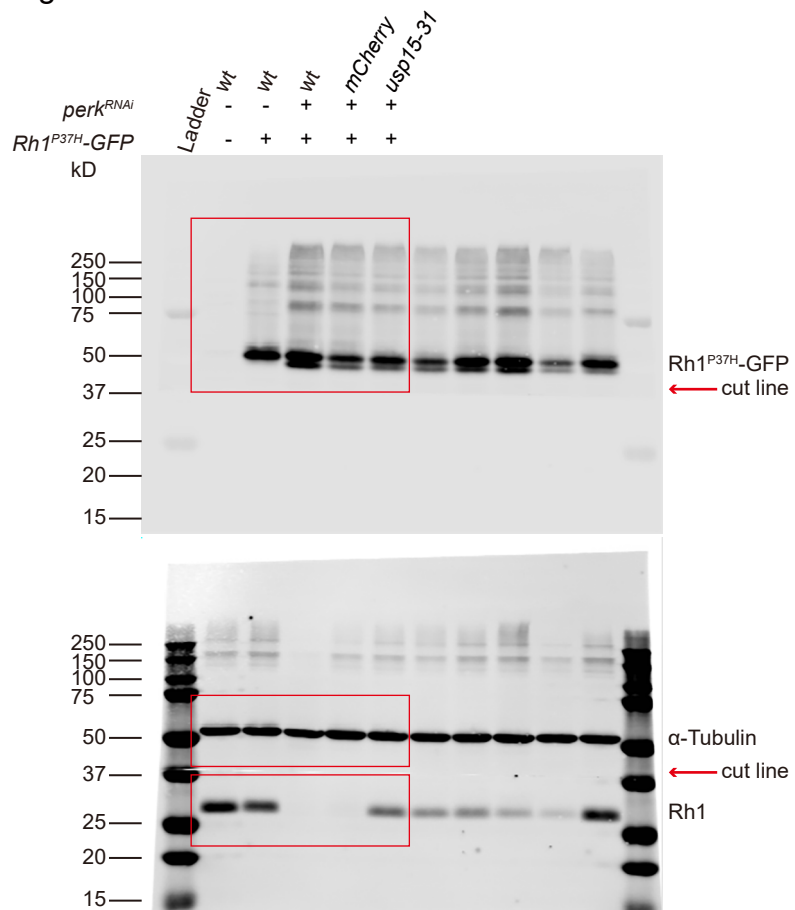

Figure 7I

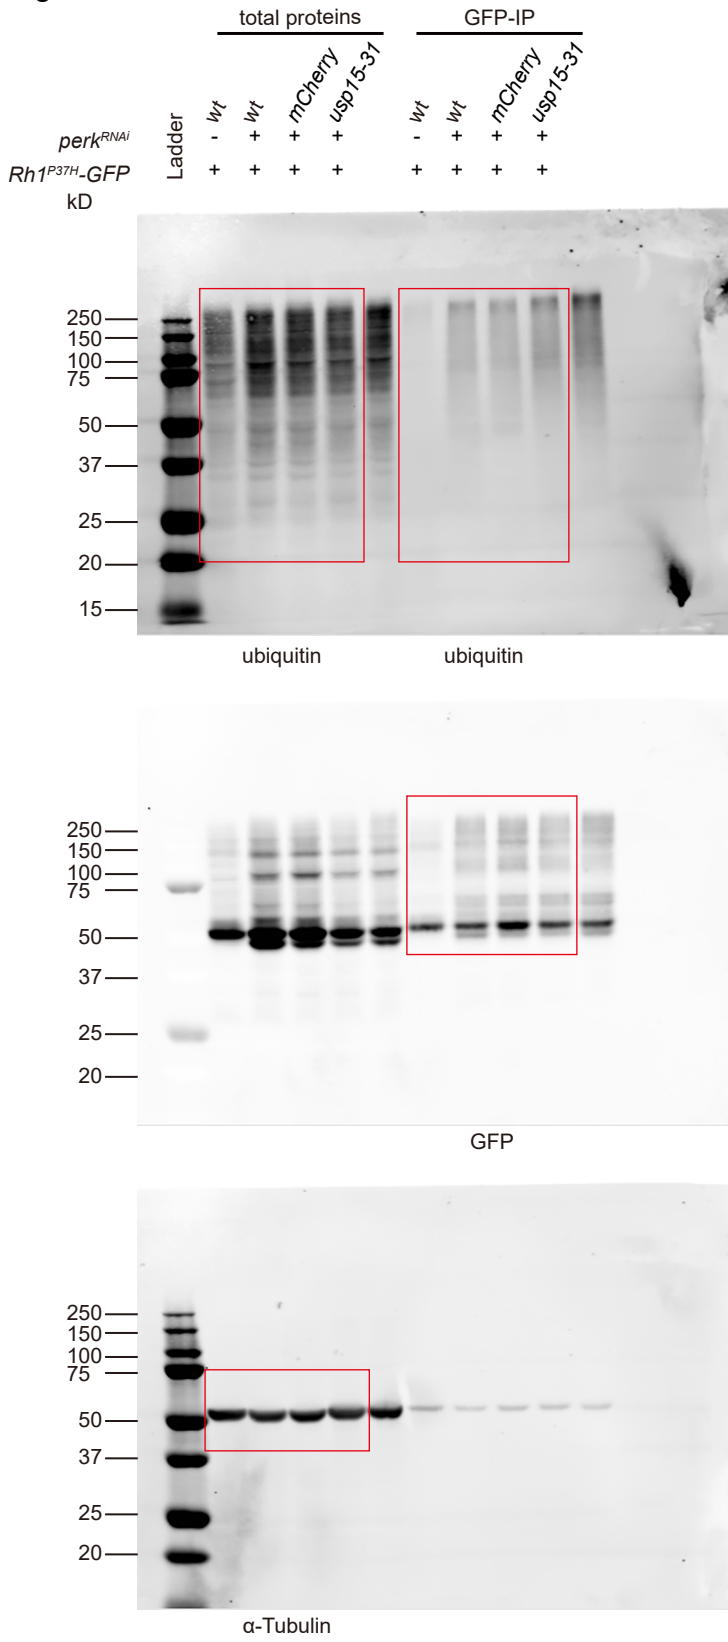

Supplement: JCB_202208147_SourceDataF7.pdf [file JCB_202208147_SourceDataF7.pdf]

Figure S2E

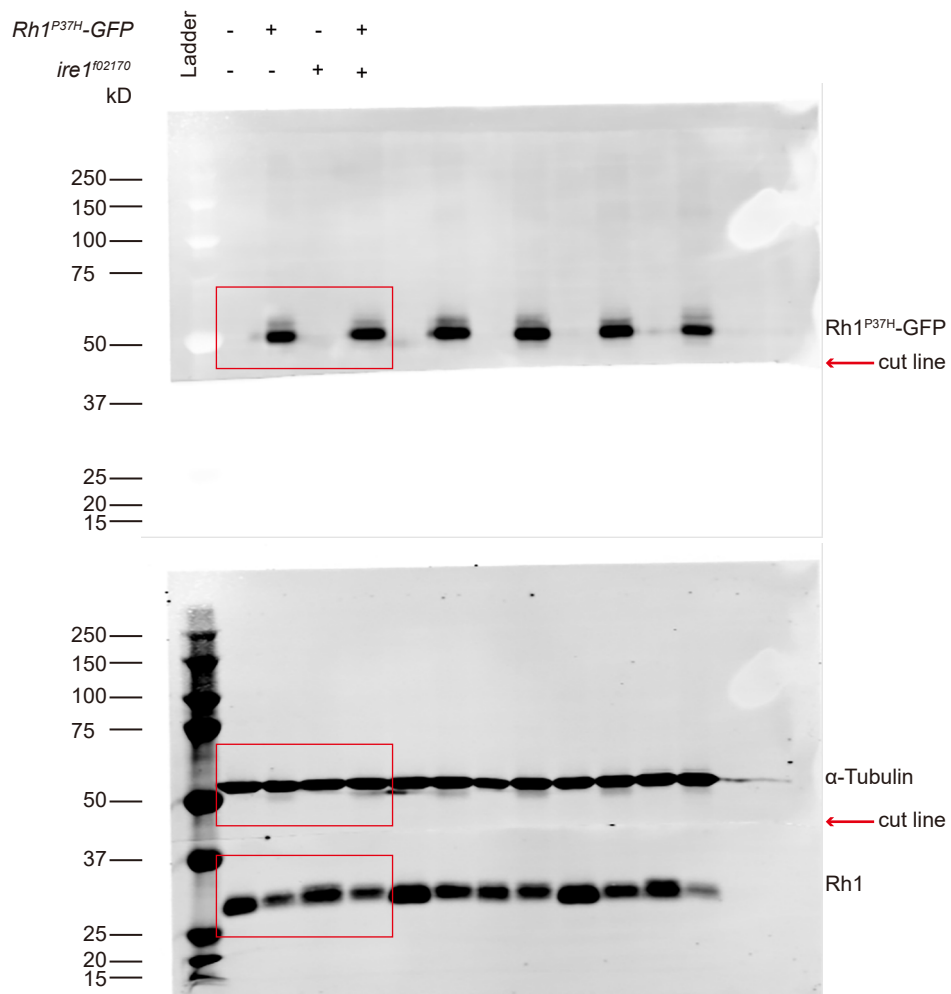

Figure S2G

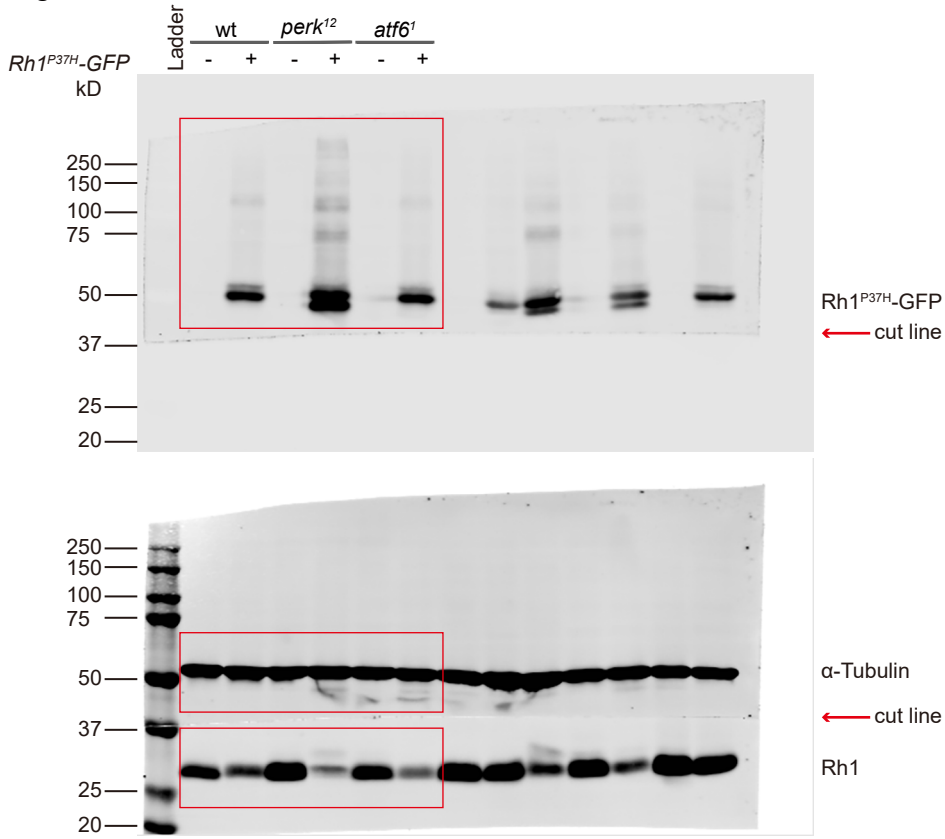

Supplement: JCB_202208147_SourceDataFS2.pdf [file JCB_202208147_SourceDataFS2.pdf]

Figure S5E

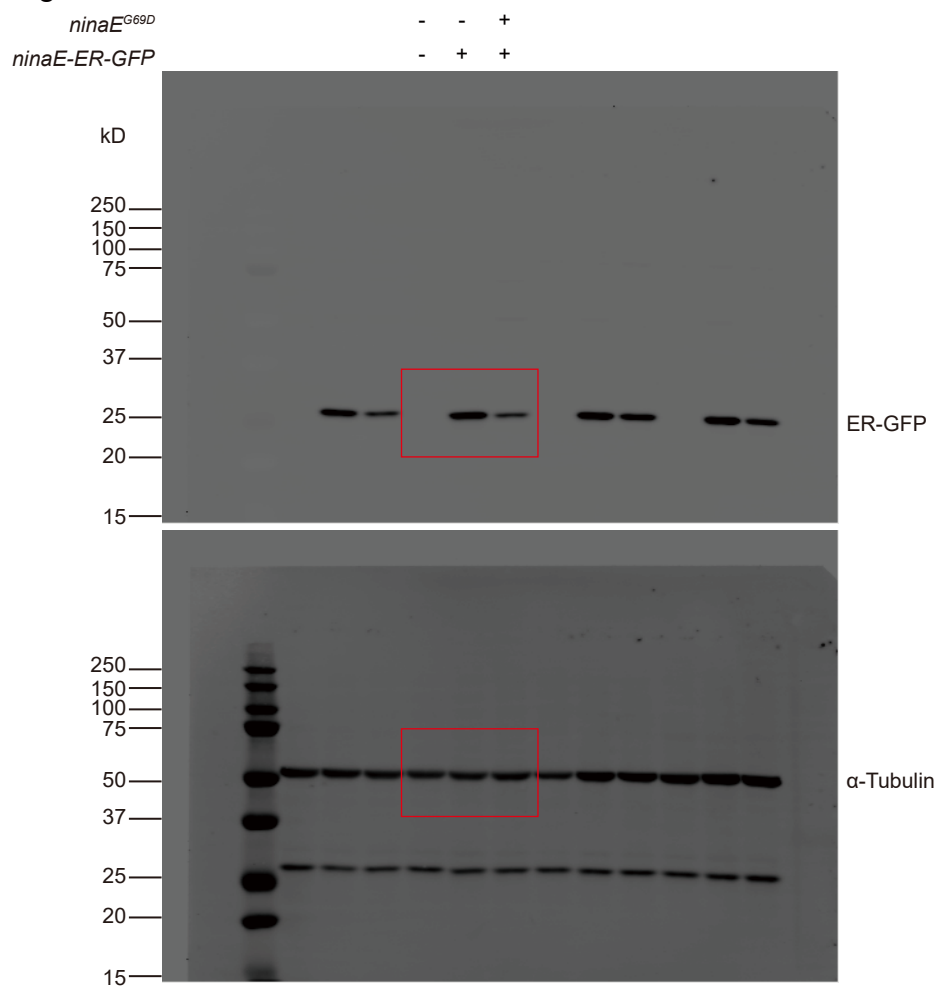

Figure S5G

*ninaE*<sup>G69D</sup>  
*ninaE*-mito-GFP

- - +  
- + +

kD

250  
150  
100  
75  
50  
37  
25  
20

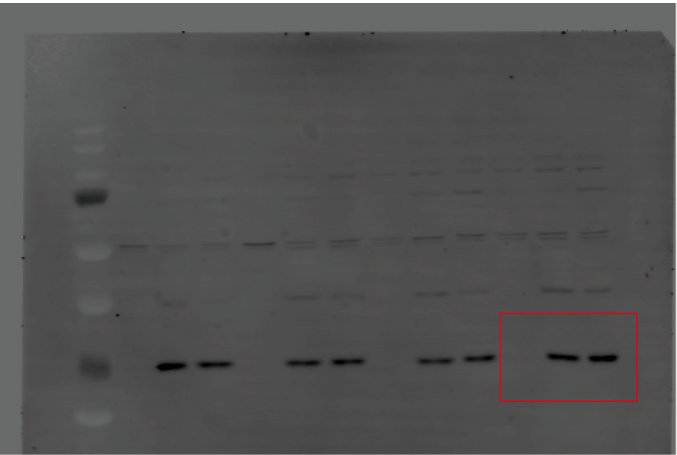

mito-GFP

250  
150  
100  
75  
50  
37  
25  
20

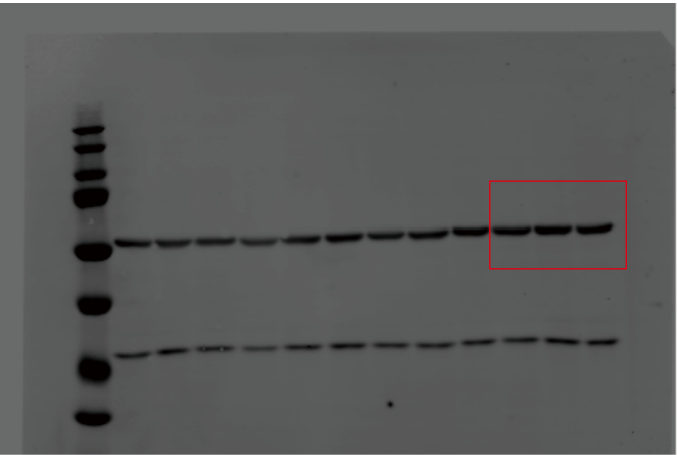

$\alpha$ -Tubulin

Supplement: JCB_202208147_SourceDataFS5.pdf [file JCB_202208147_SourceDataFS5.pdf]
